# Supplementary material for: First-principles study of the initial oxygen reduction reaction on stoichiometric and reduced CeO2(111) surfaces as a cathode catalyst for lithium–oxygen batteries
Source: Royal Society of Chemistry journal article supplement (doi:10.1039/c6ta10233f), 2017-01-01
Supplement: c6ta10233f1.pdf [file c6ta10233f1.pdf]

# Supporting Information

## First-principles study of initial oxygen reduction reaction on stoichiometric and reduced CeO<sub>2</sub> (111) surfaces as cathode catalyst for lithium-oxygen batteries

Xinyu Li<sup>a, b, d</sup>, Zongbao Li<sup>c</sup>, Xiaofeng Yang<sup>a</sup>, Lichao Jia<sup>\*a</sup>, Yong Qing Fu<sup>\*b</sup>, Bo Chi<sup>a</sup>, Jian Pu<sup>a</sup>, Jian Li<sup>a</sup>

<sup>a</sup> Center for Fuel Cell Innovation, State Key Laboratory of Material Processing and Die & Mould Technology, School of Materials Science and Engineering, Huazhong University of Science & Technology, Wuhan, Hubei 430074, China. Email: [jjalc@hust.edu.cn](mailto:jjalc@hust.edu.cn)

<sup>b</sup> Faculty of Engineering and Environment, University of Northumbria, Newcastle upon Tyne, NE1 8ST, UK. Email: [richard.fu@northumbria.ac.uk](mailto:richard.fu@northumbria.ac.uk)

<sup>c</sup> School of Material and Chemical Engineering, Tongren University, Guizhou 554300, China.

<sup>d</sup> China-EU Institute for Clean and Renewable Energy, Huazhong University of Science and Technology, Wuhan, Hubei 430074, China.

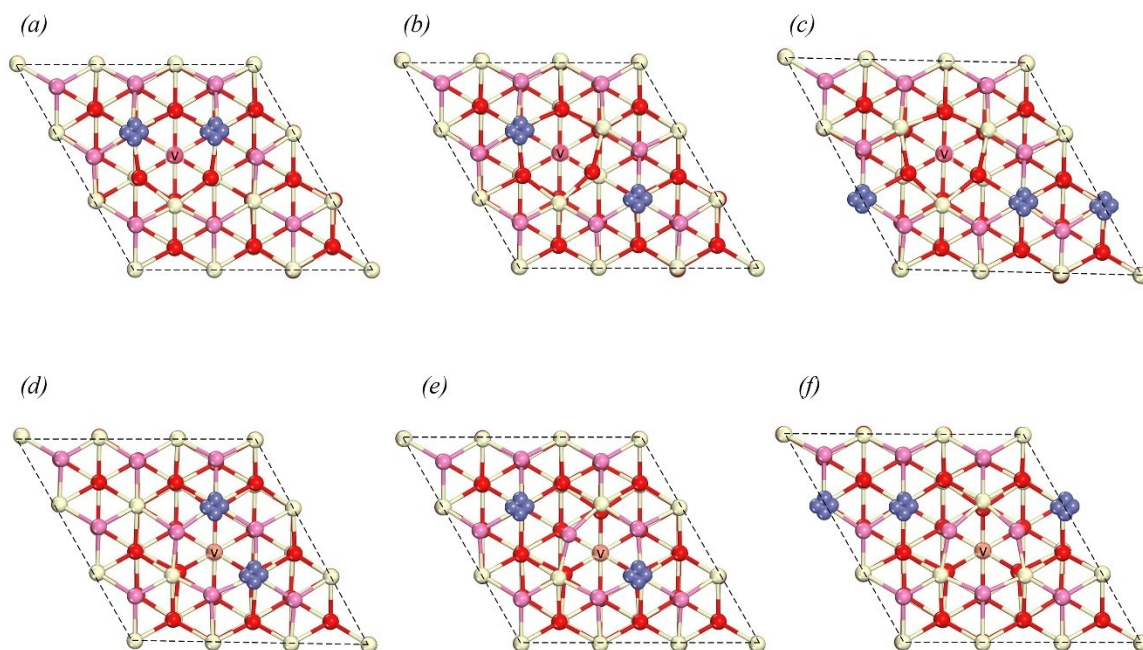

Figure S1 Optimized configurations of reduced  $\text{CeO}_2(111)$  with one surface oxygen vacancy (a-c) or subsurface oxygen vacancy (d-f).  $\text{Ce}^{3+}$  are in blue.

Table S1 Calculated formation energies (eV) of one oxygen vacancies with different  $\text{Ce}^{3+}$  at  $\text{CeO}_2(111)$ . Corresponding structures in Figure S1.

|                  | a    | b    | c    | d    | e    | f    |
|------------------|------|------|------|------|------|------|
| $E_f(\text{eV})$ | 2.34 | 2.19 | 2.13 | 2.16 | 1.96 | 1.84 |

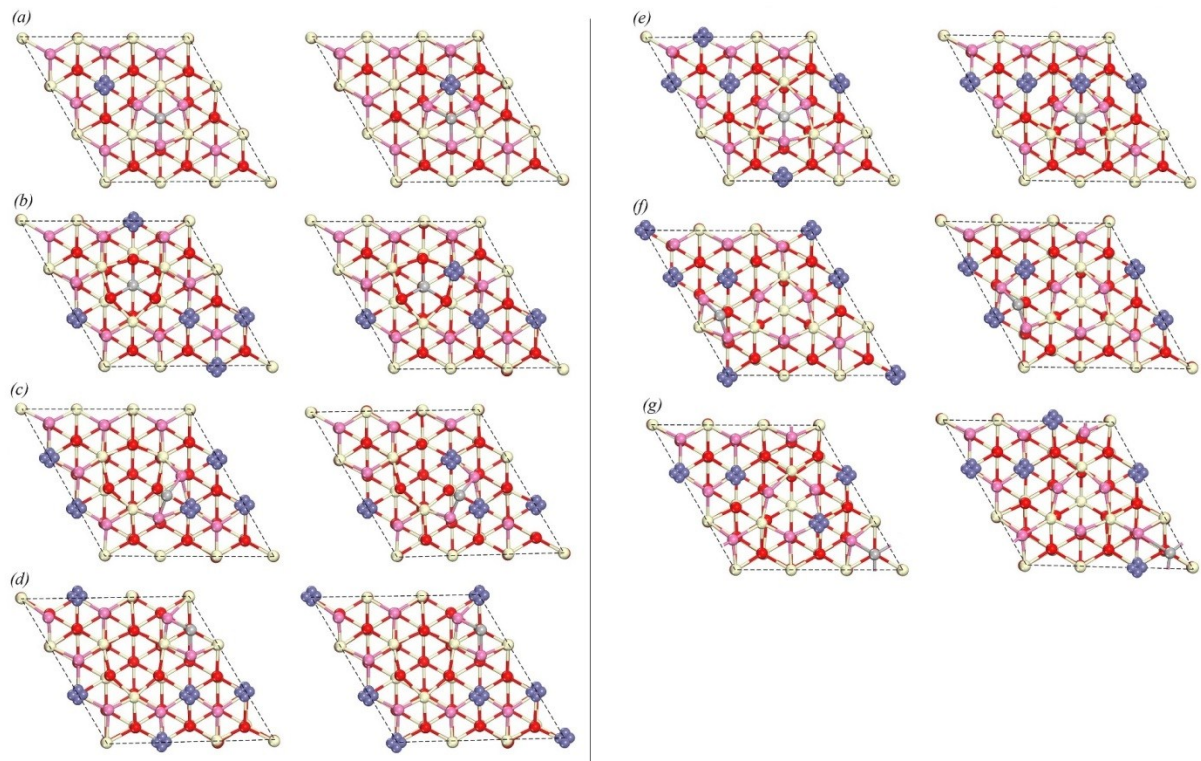

Figure S2 Optimized configurations of Li adsorption on stoichiometric and reduced  $\text{CeO}_2(111)$  with next nearest(NN)  $\text{Ce}^{3+}$  and nearest(N)  $\text{Ce}^{3+}$ .  $\text{Ce}^{3+}$  are in blue.

Table S2 The adsorption energies (eV) of Li at the stoichiometric and reduced  $\text{CeO}_2(111)$  surfaces with next nearest (NN)  $\text{Ce}^{3+}$  and nearest (N)  $\text{Ce}^{3+}$ . Corresponding structures in Figure S2.

|                             | a     | b     | c     | d     | e     | f     | g     |
|-----------------------------|-------|-------|-------|-------|-------|-------|-------|
| Left (NN $\text{Ce}^{3+}$ ) | -2.06 | -0.78 | -1.12 | -1.78 | -2.25 | -1.61 | -1.74 |
| Right(N $\text{Ce}^{3+}$ )  | -1.78 | -0.99 | -0.95 | -1.64 | -2.01 | -1.25 | -1.41 |

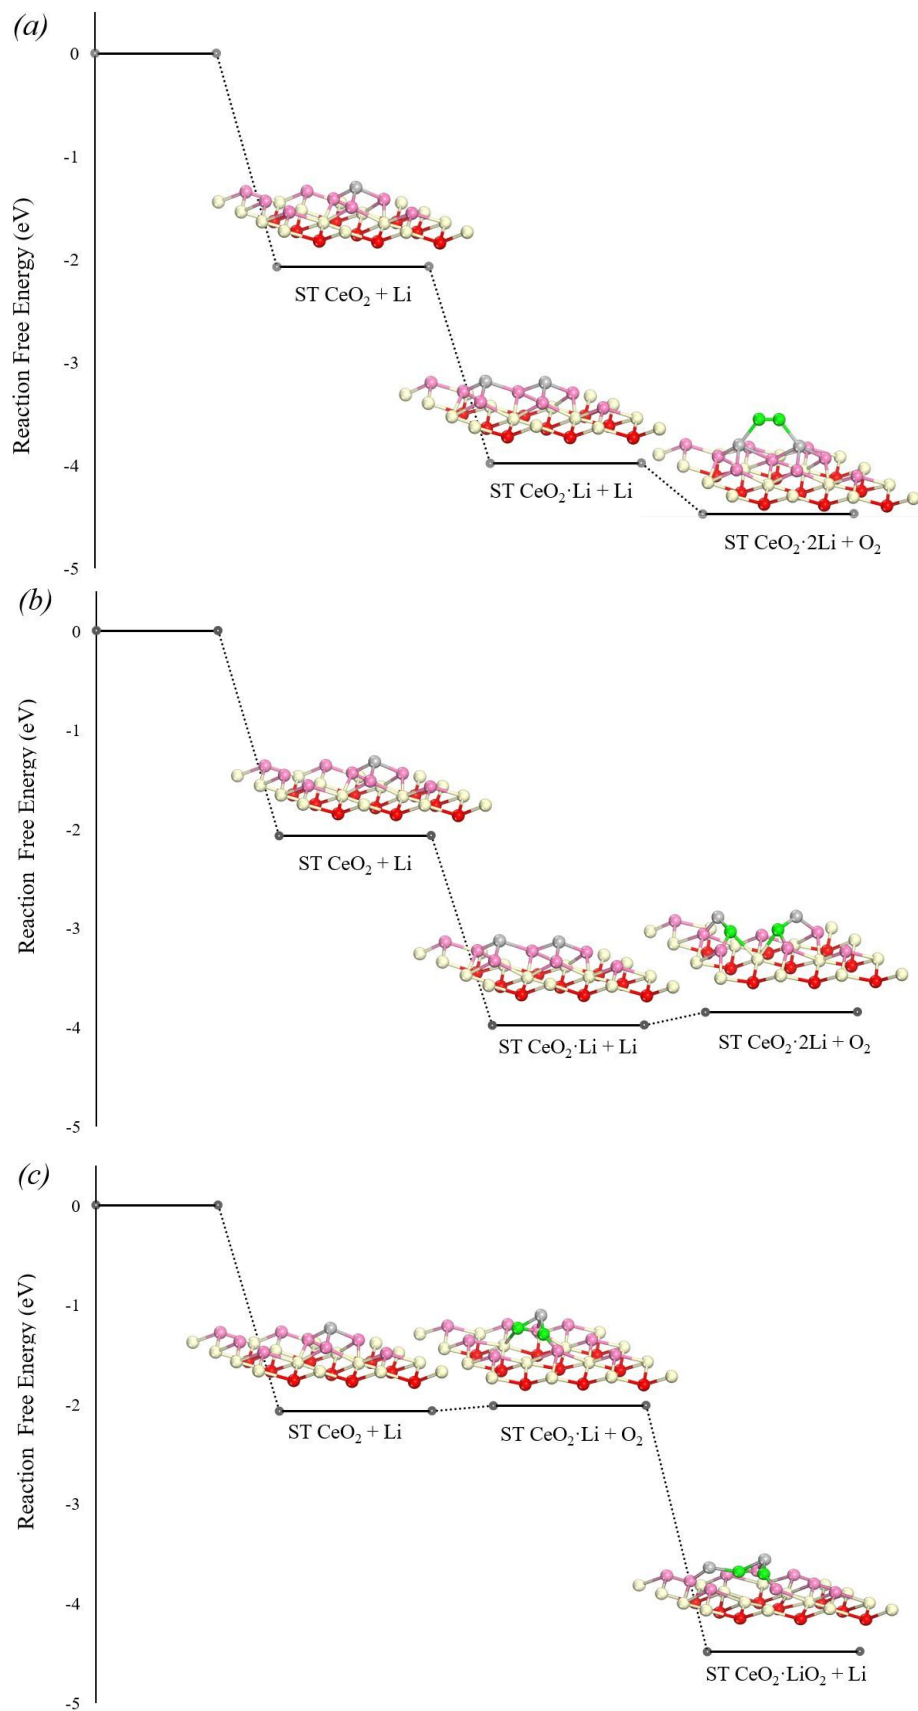

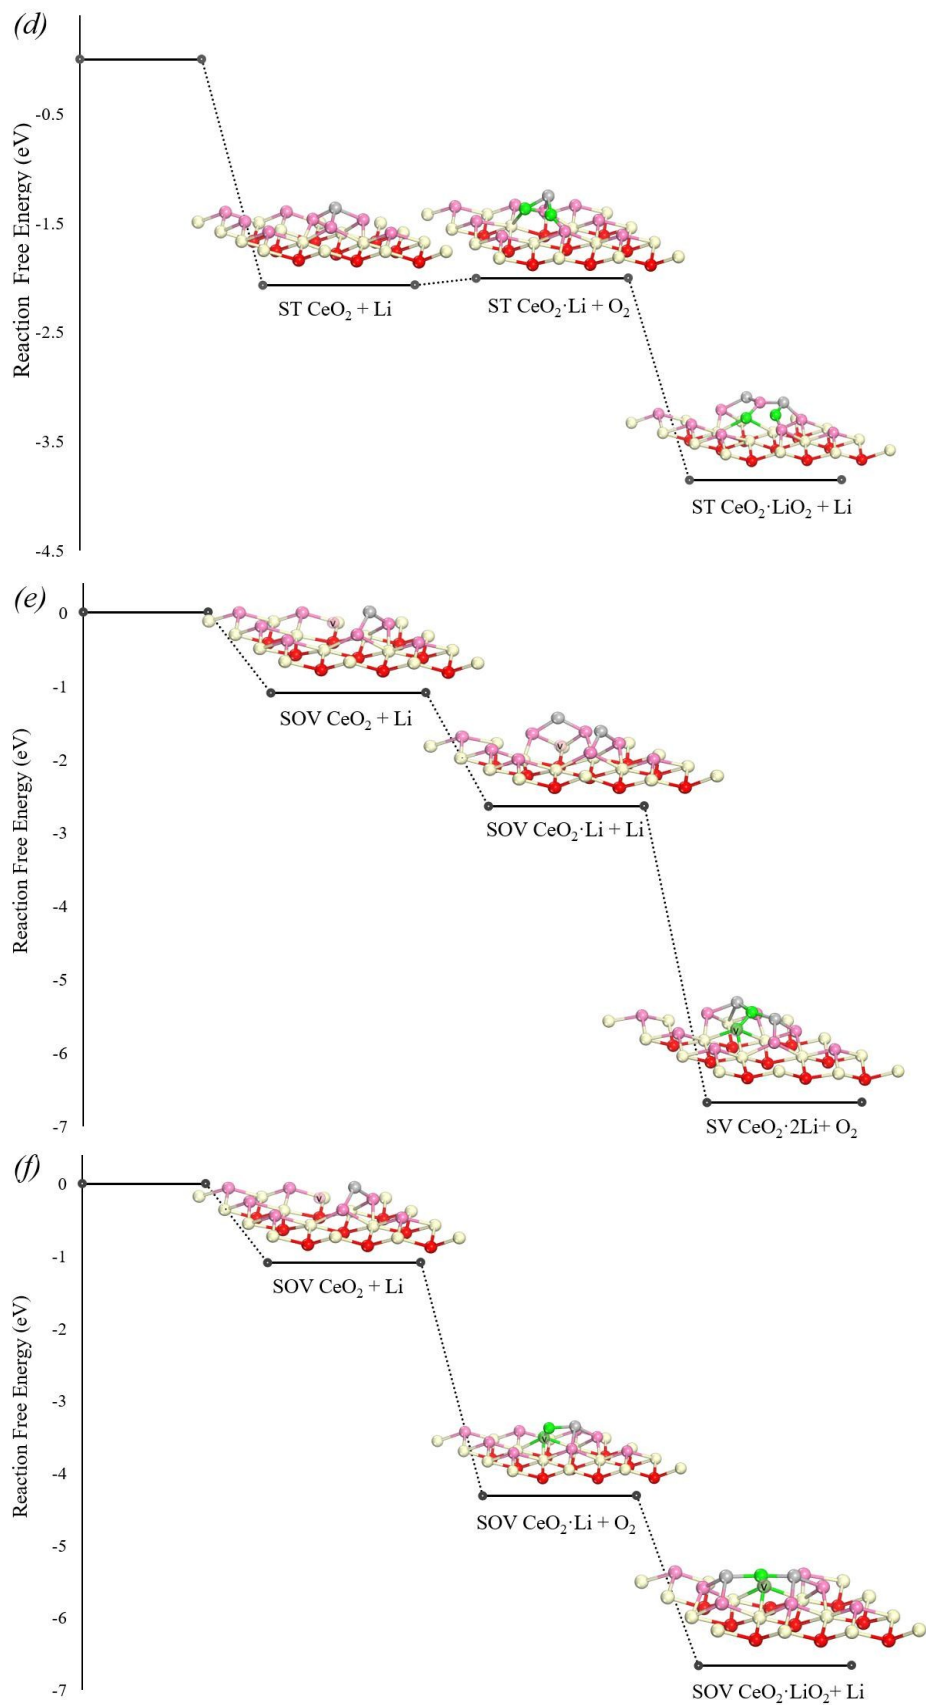

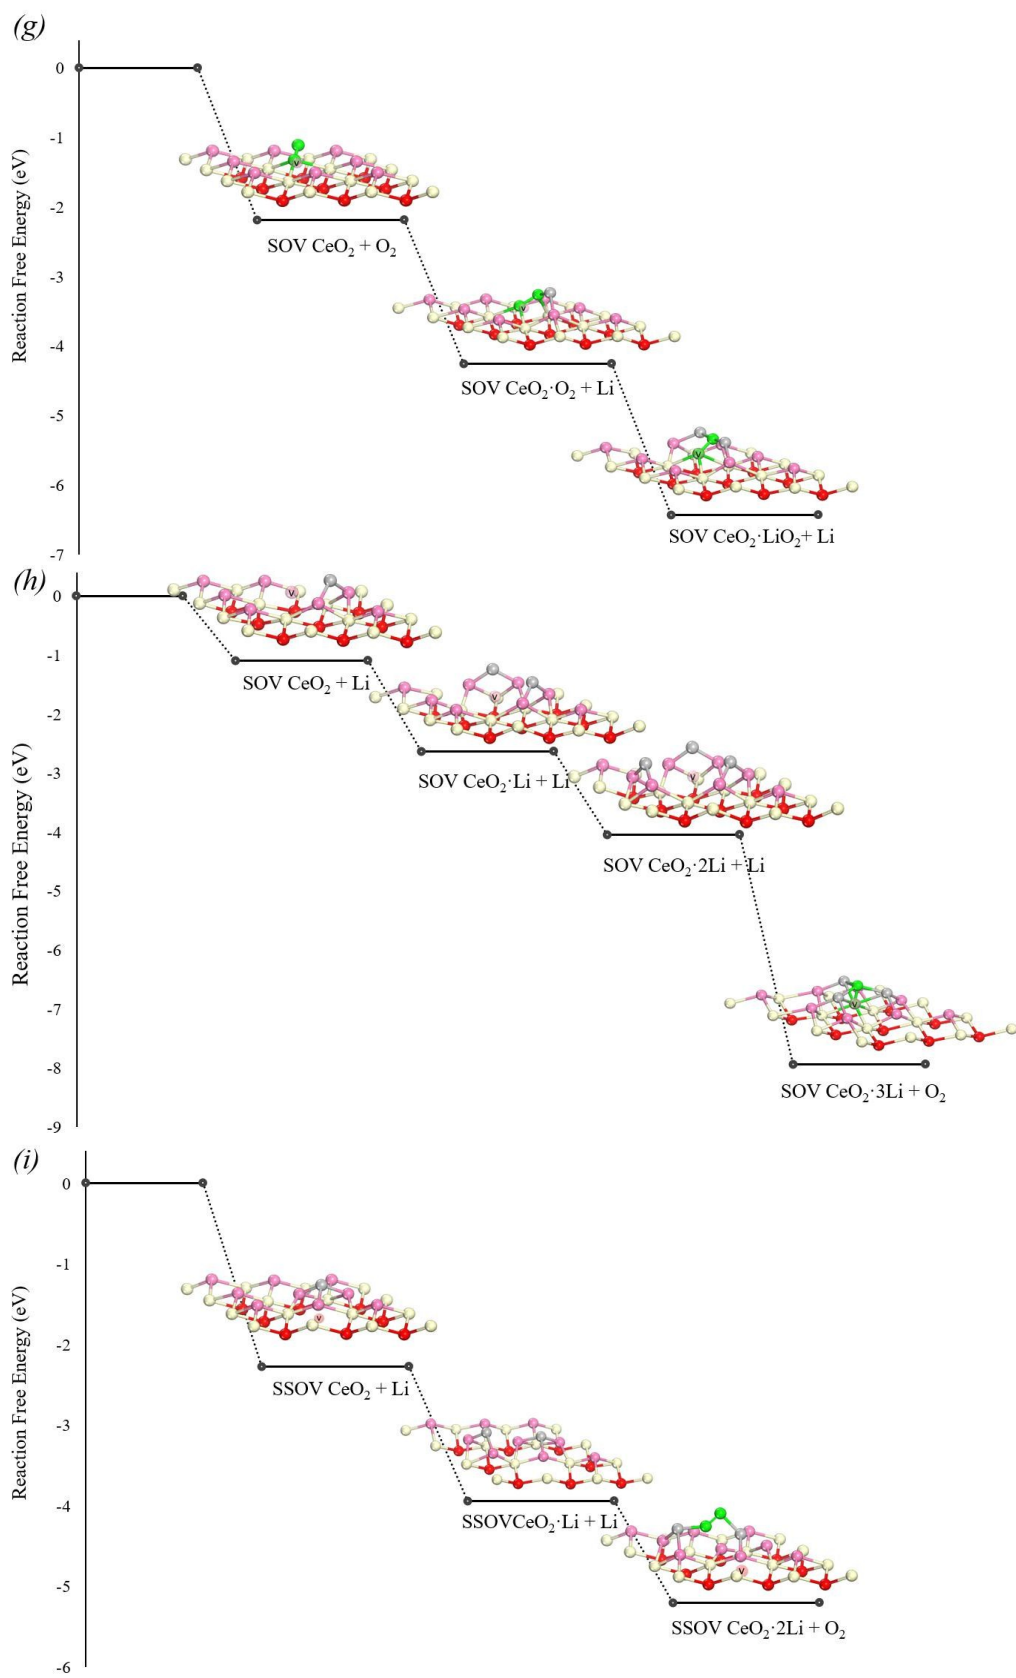

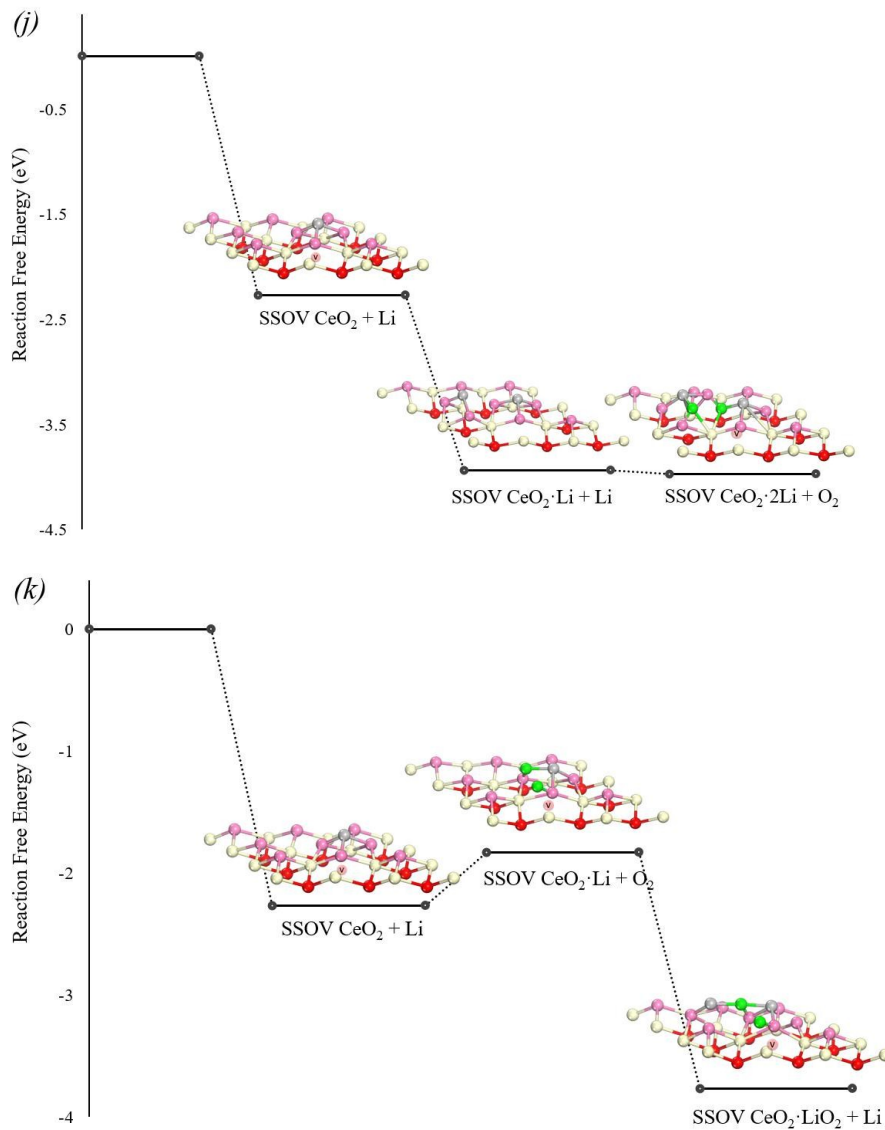

Figure S3 Detailed energy diagram and the schematics for the initial ORR process through different pathway, a, b, c, d at the ST  $\text{CeO}_2$  surface, e, f, g, h at the SOV  $\text{CeO}_2$  surface and i, j, k at the SSOV  $\text{CeO}_2$  surface.

Table S3 Detailed reaction steps and corresponding  $\Delta G_n$  (eV) for the initial ORR on the ST, SOV, and SSOV CeO<sub>2</sub> surfaces.

|   | Surface Type                | Reaction step                                                   | $\Delta G_n$ (eV) |
|---|-----------------------------|-----------------------------------------------------------------|-------------------|
| a | ST CeO <sub>2</sub> (111)   | ST + Li → ST_Li                                                 | -2.07             |
|   |                             | ST_Li + Li → ST_2Li                                             | -1.91             |
|   |                             | ST_2Li + O <sub>2</sub> → ST_Li <sub>2</sub> O <sub>2</sub>     | -0.49             |
| b | ST CeO <sub>2</sub> (111)   | ST + Li → ST_Li                                                 | -2.07             |
|   |                             | ST_Li + Li → ST_2Li                                             | -1.91             |
|   |                             | ST_2Li + O <sub>2</sub> → ST_Li <sub>2</sub> O <sub>2</sub>     | +0.13             |
| c | ST CeO <sub>2</sub> (111)   | ST + Li → ST_Li                                                 | -2.07             |
|   |                             | ST_Li + O <sub>2</sub> → ST_LiO <sub>2</sub>                    | +0.07             |
|   |                             | ST_LiO <sub>2</sub> + Li → ST_Li <sub>2</sub> O <sub>2</sub>    | -2.48             |
| d | ST CeO <sub>2</sub> (111)   | ST + Li → ST_Li                                                 | -2.07             |
|   |                             | ST_Li + O <sub>2</sub> → ST_LiO <sub>2</sub>                    | +0.07             |
|   |                             | ST_LiO <sub>2</sub> + Li → ST_Li <sub>2</sub> O <sub>2</sub>    | -1.85             |
| e | SOV CeO <sub>2</sub> (111)  | SOV + Li → SOV_Li                                               | -1.09             |
|   |                             | SOV_Li + Li → SOV_2Li                                           | -1.55             |
|   |                             | SOV_2Li + O <sub>2</sub> → SOV_Li <sub>2</sub> O <sub>2</sub>   | -4.03             |
| f | SOV CeO <sub>2</sub> (111)  | SOV + Li → SOV_Li                                               | -1.09             |
|   |                             | SOV_Li + O <sub>2</sub> → SOV_LiO <sub>2</sub>                  | -3.22             |
|   |                             | SOV_LiO <sub>2</sub> → SOV_Li <sub>2</sub> O <sub>2</sub>       | -2.35             |
| g | SOV CeO <sub>2</sub> (111)  | SOV + O <sub>2</sub> → SOV_O <sub>2</sub>                       | -2.19             |
|   |                             | SOV_O <sub>2</sub> + Li → SOV_LiO <sub>2</sub>                  | -2.06             |
|   |                             | SOV_LiO <sub>2</sub> + Li → SOV_Li <sub>2</sub> O <sub>2</sub>  | -2.17             |
| h | SOV CeO <sub>2</sub> (111)  | SOV + Li → SOV_Li                                               | -1.09             |
|   |                             | SOV_Li + Li → SOV_2Li                                           | -1.55             |
|   |                             | SOV_2Li + Li → SOV_3Li                                          | -1.41             |
|   |                             | SOV_3Li + O <sub>2</sub> → SOV_Li <sub>3</sub> O <sub>2</sub>   | -3.90             |
| i | SSOV CeO <sub>2</sub> (111) | SSOV + Li → SSOV_Li                                             | -2.27             |
|   |                             | SSOV_Li + Li → SSOV_2Li                                         | -1.67             |
|   |                             | SSOV_2Li + O <sub>2</sub> → SSOV_Li <sub>2</sub> O <sub>2</sub> | -1.27             |
| j | SSOV CeO <sub>2</sub> (111) | SSOV + Li → SSOV_Li                                             | -2.27             |
|   |                             | SSOV_Li + Li → SSOV_2Li                                         | -1.67             |
|   |                             | SSOV_2Li + O <sub>2</sub> → SSOV_Li <sub>2</sub> O <sub>2</sub> | -0.03             |
| k | SSOV CeO <sub>2</sub> (111) | SSOV + Li → SSOV_Li                                             | -2.27             |
|   |                             | SSOV_Li + O <sub>2</sub> → SSOV_LiO <sub>2</sub>                | +0.45             |
|   |                             | SSOV_LiO <sub>2</sub> → SSOV_Li <sub>2</sub> O <sub>2</sub>     | -1.94             |
